# Supplementary material for: A maternal dorsoventral prepattern revealed by an asymmetric distribution of ventralizing molecules before fertilization in Xenopus laevis
Source: Frontiers journal article supplement (doi:10.3389/fcell.2024.1365705), 2024-03-20
Supplement: Data_Sheet_1.PDF [file Data_Sheet_1.PDF]

## Supplementary Material

Figure S1

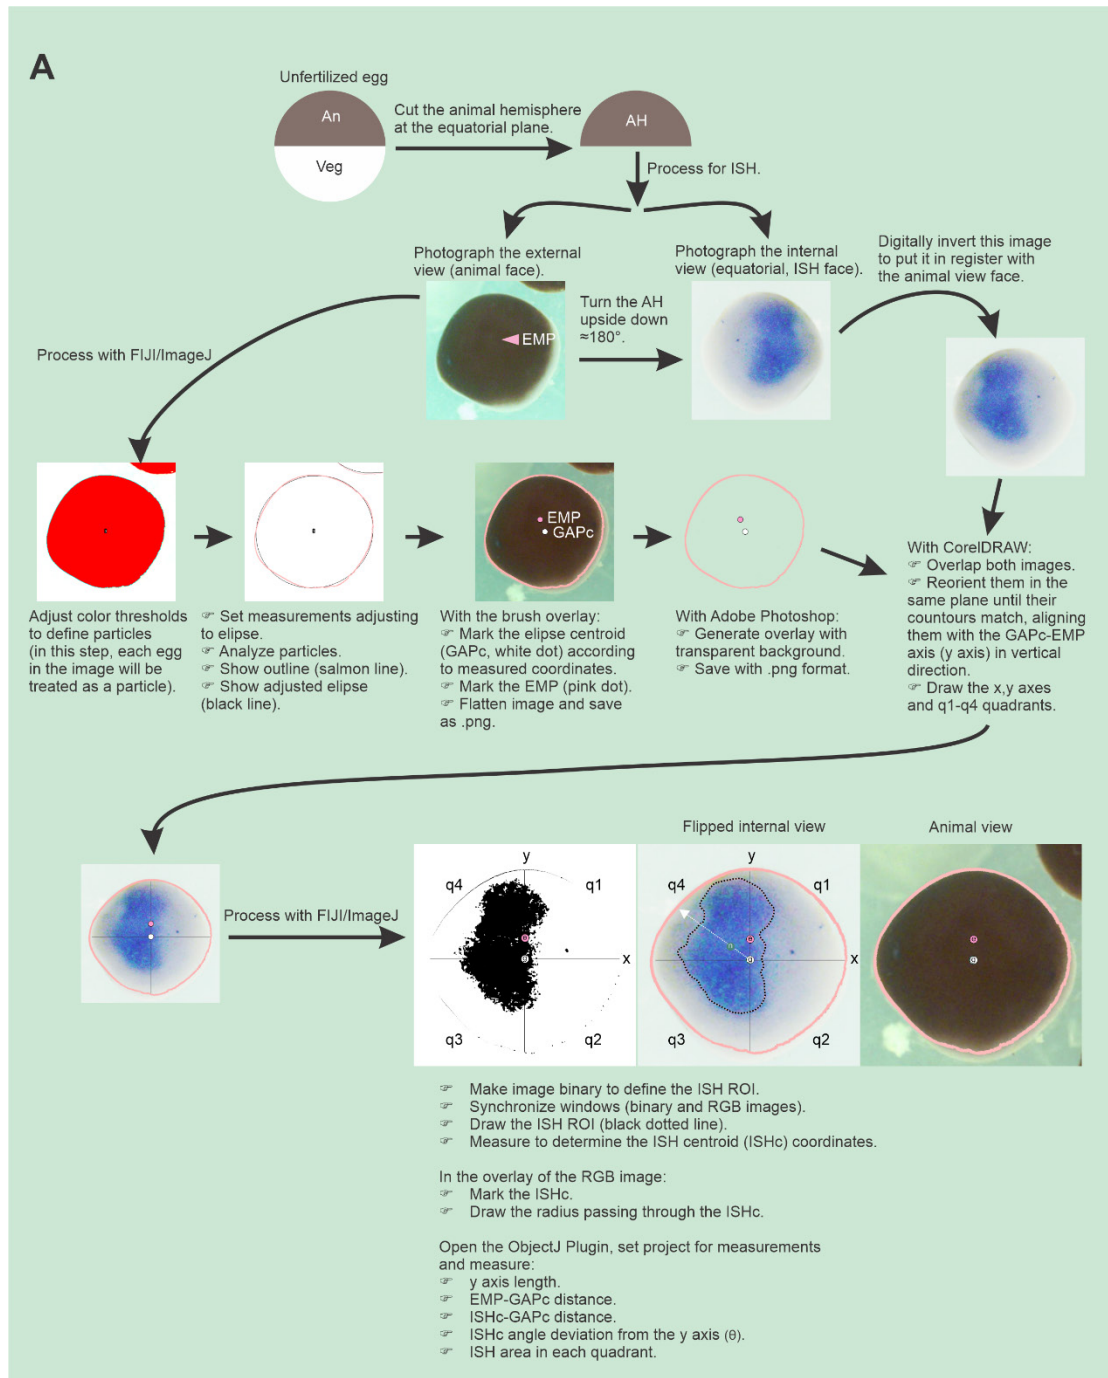

Represent  
results with  
CorelDRAW.

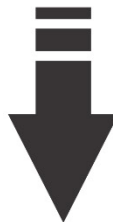

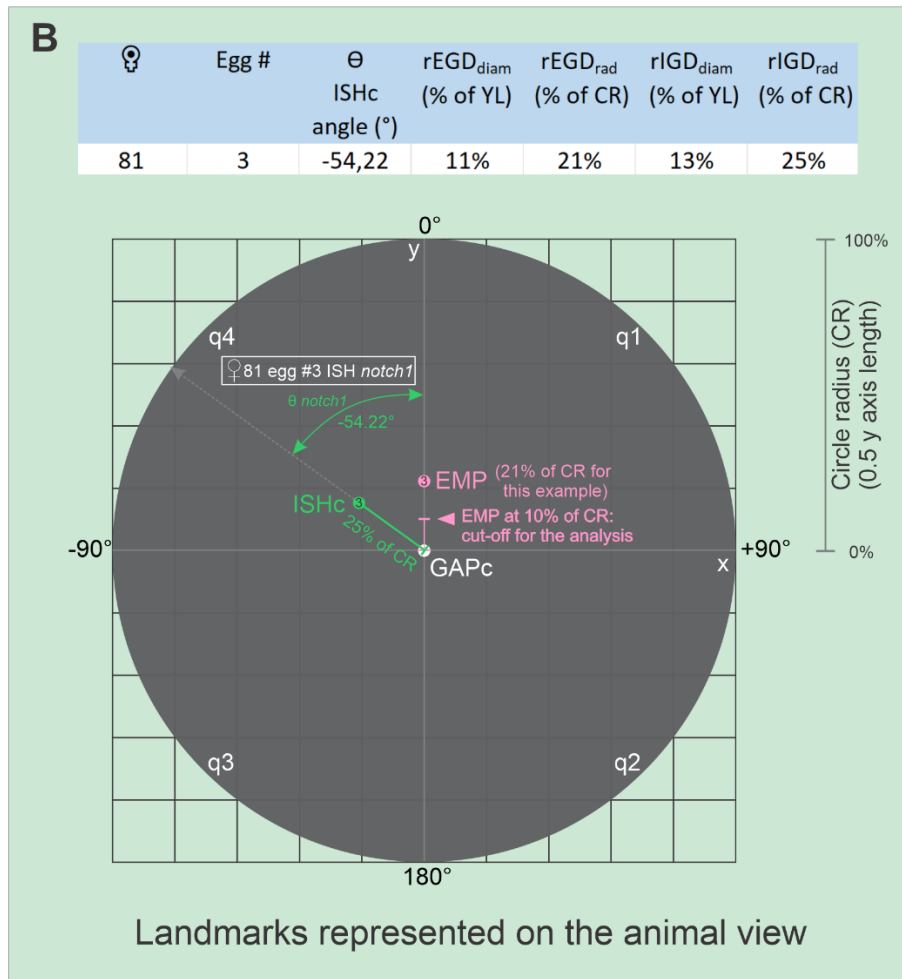

**Figure S1:** Morphometric analysis procedure for ISH domains. (A) Example of the analysis for *notch1* ISH with egg #3 from female #81. See project for measurements with the ObjectJ plugin in Supplementary Methods below this figure. Measurements for this egg are included in Table S4. (B) Graphic representation of measurements in a polar coordinates template. See more details for the whole procedure in the main text. AH, animal hemisphere.

# Supplementary Methods

## Measurement project for the ObjectJ Plugin

1. In the Objects box tool, we defined the following objects to draw in the image linked to the project:

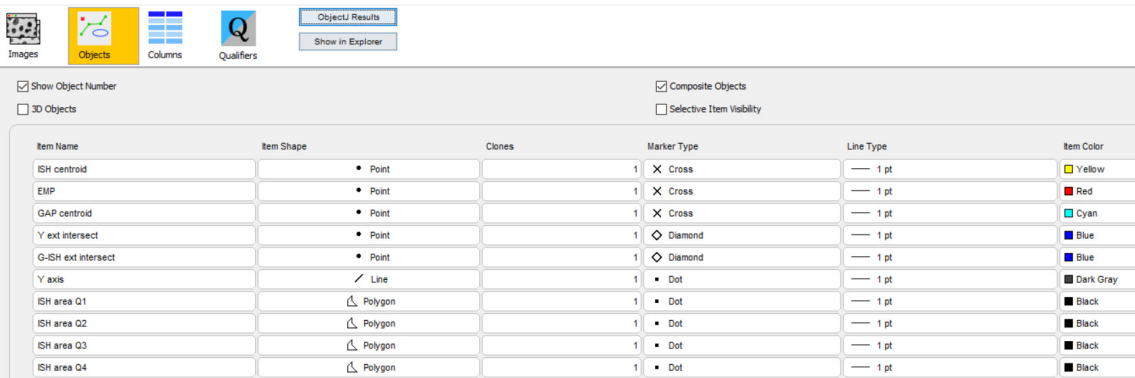

| Item Name           | Item Shape | Clones | Marker Type | Line Type | Item Color |
|---------------------|------------|--------|-------------|-----------|------------|
| ISH centroid        | Point      | 1      | X Cross     | 1 pt      | Yellow     |
| EMP                 | Point      | 1      | X Cross     | 1 pt      | Red        |
| GAP centroid        | Point      | 1      | X Cross     | 1 pt      | Cyan       |
| Y ext intersect     | Point      | 1      | Diamond     | 1 pt      | Blue       |
| G-ISH ext intersect | Point      | 1      | Diamond     | 1 pt      | Blue       |
| Y axis              | Line       | 1      | Dot         | 1 pt      | Dark Gray  |
| ISH area Q1         | Polygon    | 1      | Dot         | 1 pt      | Black      |
| ISH area Q2         | Polygon    | 1      | Dot         | 1 pt      | Black      |
| ISH area Q3         | Polygon    | 1      | Dot         | 1 pt      | Black      |
| ISH area Q4         | Polygon    | 1      | Dot         | 1 pt      | Black      |

- Y ext intersect: the point of the y axis intersecting the egg’s outline.
- Y-axis: a line encompassing the entire y-axis length.
- G-ISH ext intersect: the point of the GAPc-ISHc radius intersecting the egg’s outline.

2. In the Columns box tool, we defined the following operations:

Operation

Angle

1st Operand

Item type

G-ISH ext inters...

Clone#

1

Point#

1

2nd Operand

Item type

GAP centroid

Clone#

1

Point#

1

3rd Operand

Item type

Y ext intersect

Clone#

1

Point#

1

Operation

Distance

1st Operand

Item type

EMP

Clone#

1

Point#

1

2nd Operand

Item type

GAP centroid

Clone#

1

Point#

1

Operation

Distance

1st Operand

Item type

ISH centroid

Clone#

1

Point#

1

2nd Operand

Item type

GAP centroid

Clone#

1

Point#

1

Operation

Distance

1st Operand

Item type

EMP

Clone#

1

Point#

1

2nd Operand

Item type

ISH centroid

Clone#

1

Point#

1

|           |        |         |           |        |
|-----------|--------|---------|-----------|--------|
| Operation | Length | Operand | Item type | Clone# |
|           |        |         | Y axis    | 1      |

|           |      |         |             |        |
|-----------|------|---------|-------------|--------|
| Operation | Area | Operand | Item type   | Clone# |
|           |      |         | ISH area Q1 | 1      |

|           |      |         |             |        |
|-----------|------|---------|-------------|--------|
| Operation | Area | Operand | Item type   | Clone# |
|           |      |         | ISH area Q2 | 1      |

|           |      |         |             |        |
|-----------|------|---------|-------------|--------|
| Operation | Area | Operand | Item type   | Clone# |
|           |      |         | ISH area Q3 | 1      |

|           |      |         |             |        |
|-----------|------|---------|-------------|--------|
| Operation | Area | Operand | Item type   | Clone# |
|           |      |         | ISH area Q4 | 1      |

Screen capture of the procedure, with objects in the list (left side of the figure) marked up to the ISH q1 area, just about proceeding to demarcate the ISH q2 area:

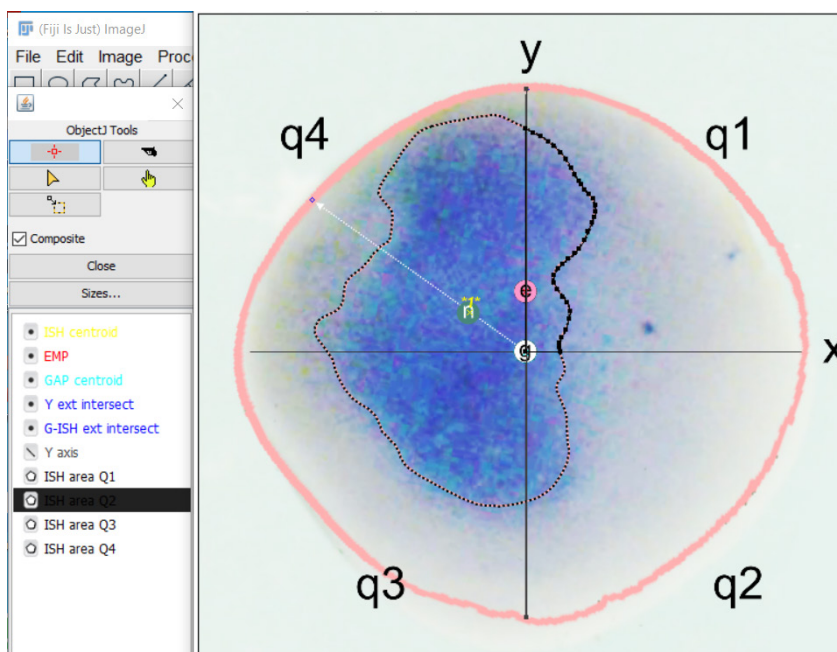

Figure S2.

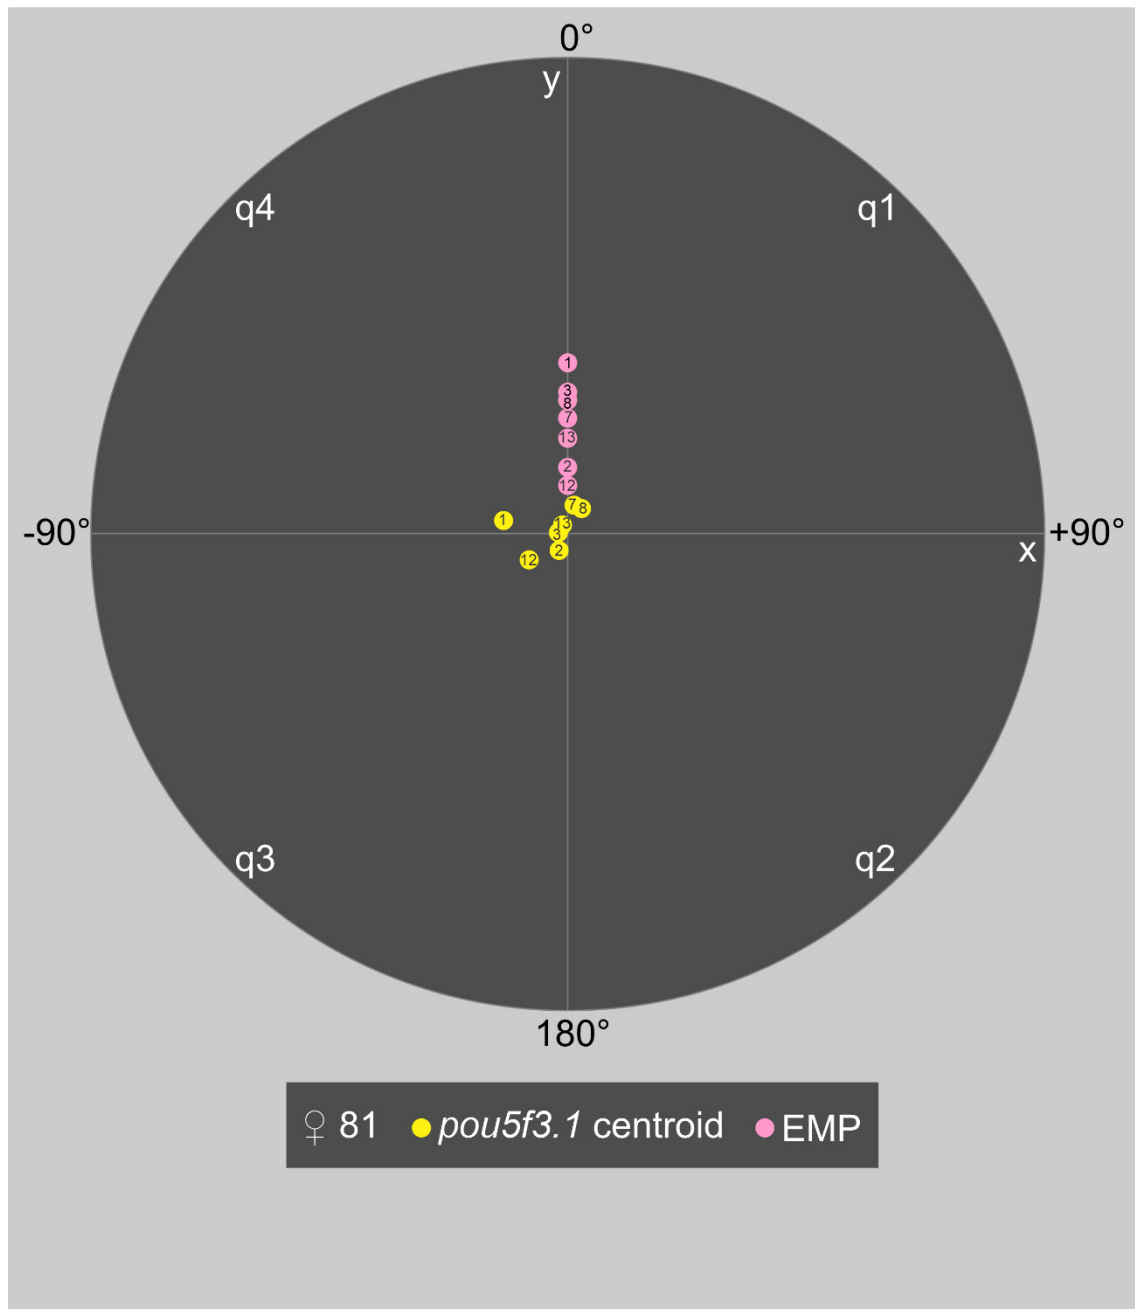

**Figure S2.** Polar coordinates graphic showing the spatial distribution of EMP and ISH centroids for *pou5f3.1* for eggs from female #81. The numbers within the circles indicate the individual egg #. The graphic was constructed according to the results shown in Table S4.

Figure S3.

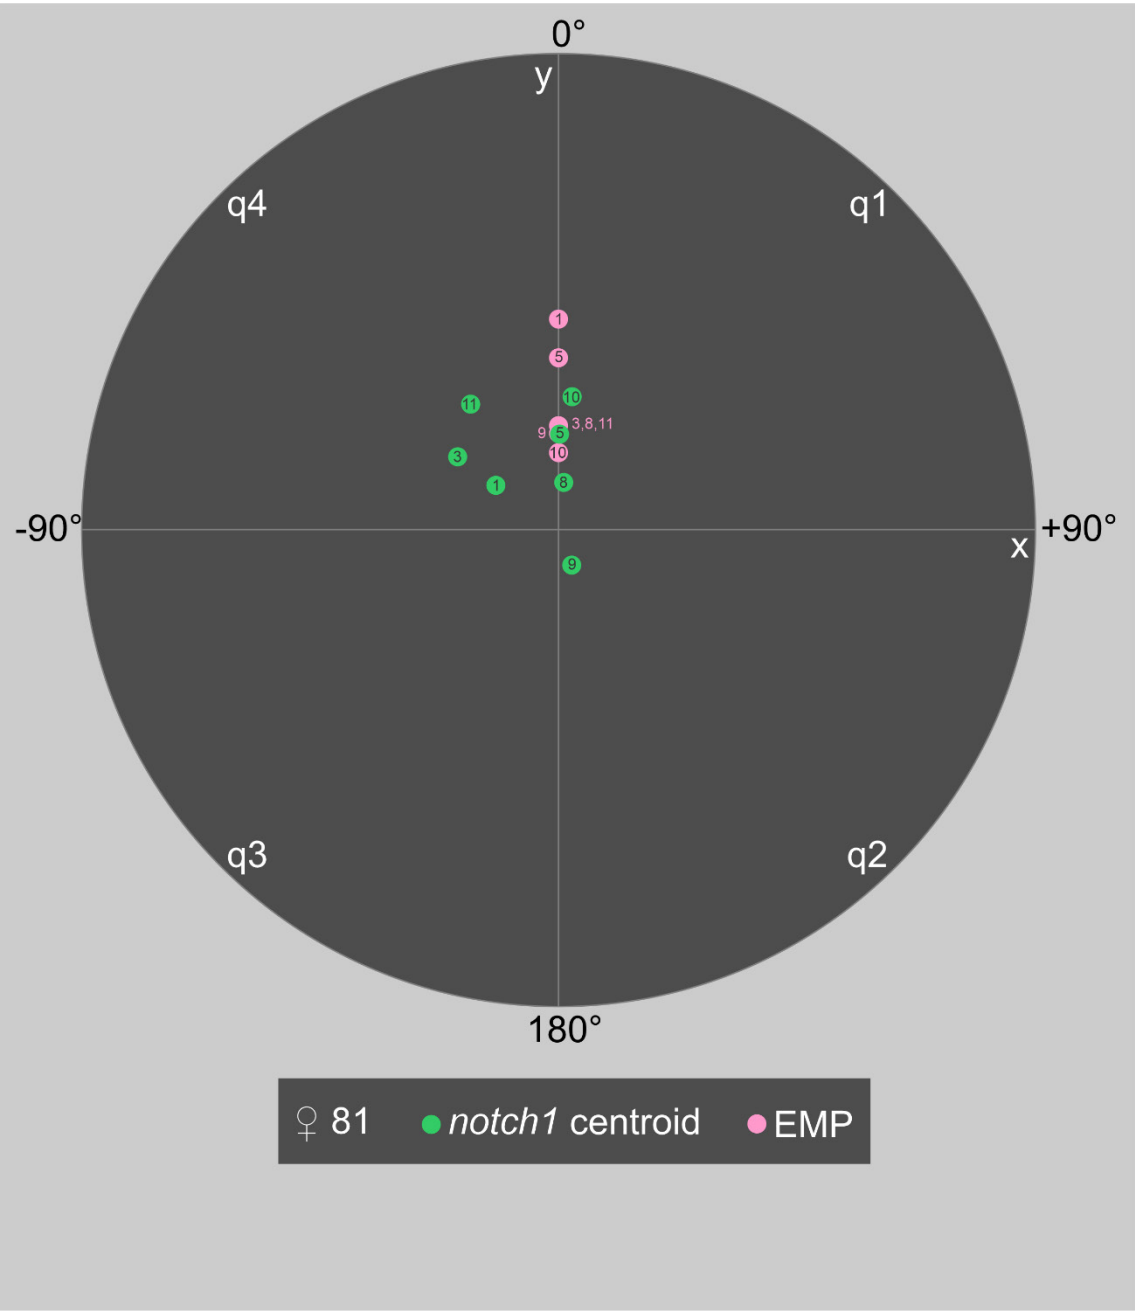

**Figure S3.** Polar coordinates graphic showing the spatial distribution of EMP and ISH centroids for *notch1* for eggs from female #81. The numbers within or beside the circles indicate the individual egg #. The graphic was constructed according to the results shown in Table S4.

Figure S4.

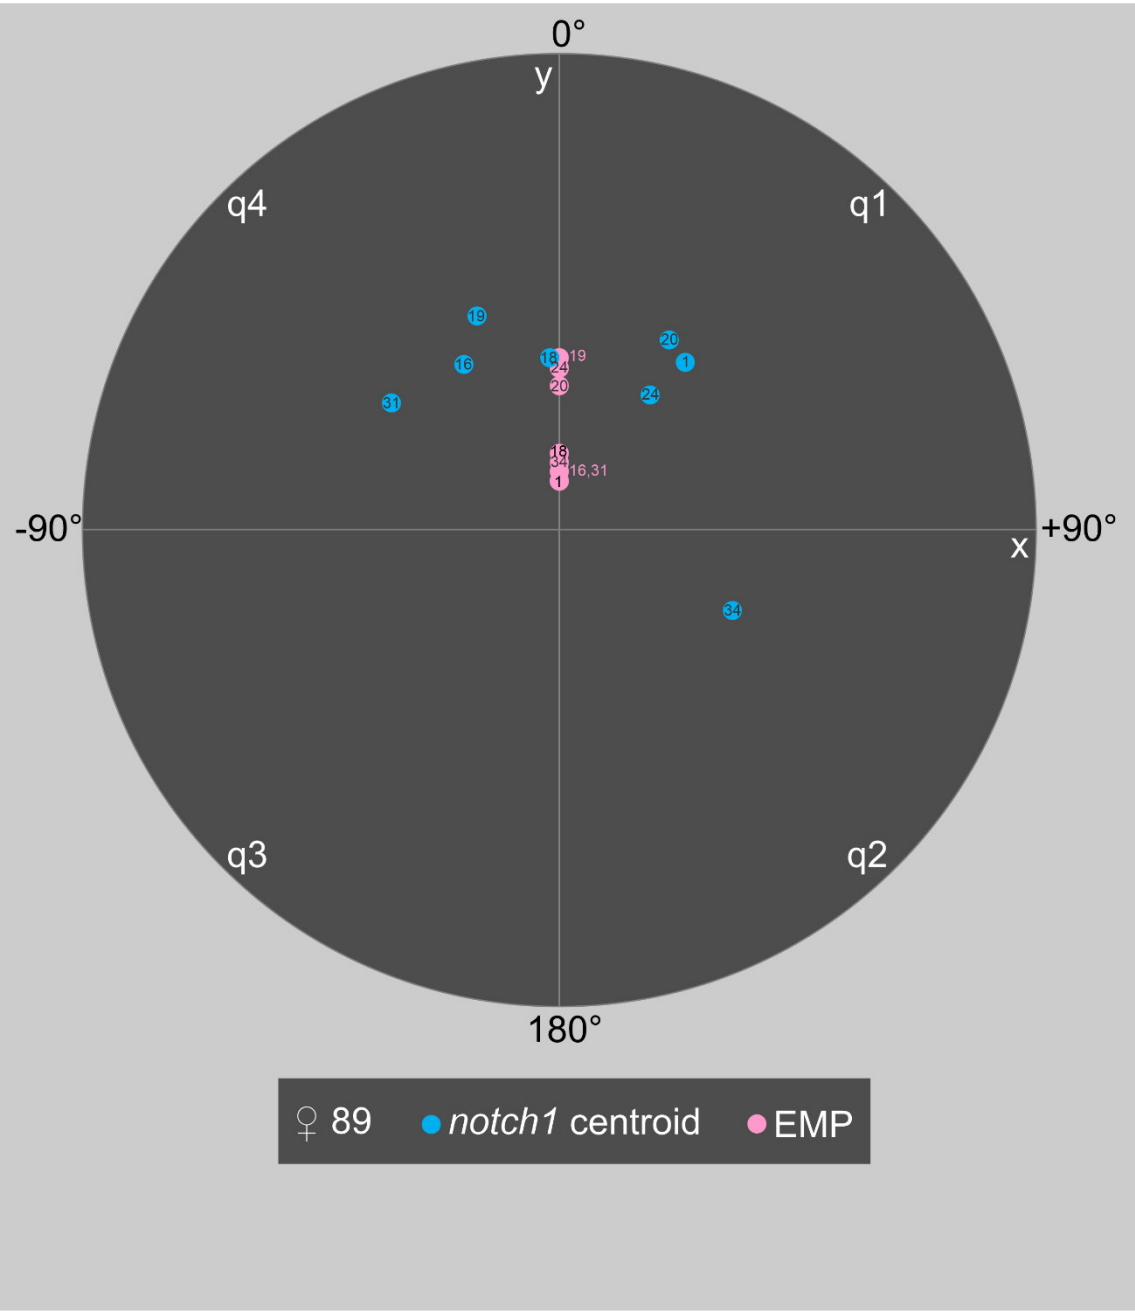

**Figure S4.** Polar coordinates graphic showing the spatial distribution of EMP and ISH centroids for *notch1* for eggs from female #89. The numbers within or beside the circles indicate the individual egg #. The graphic was constructed according to the results shown in Table S4.



Movie S1.

Image transition from Fig. S2, S3, and S4 to graphic composite shown in Fig. 5F.

Figure S5.

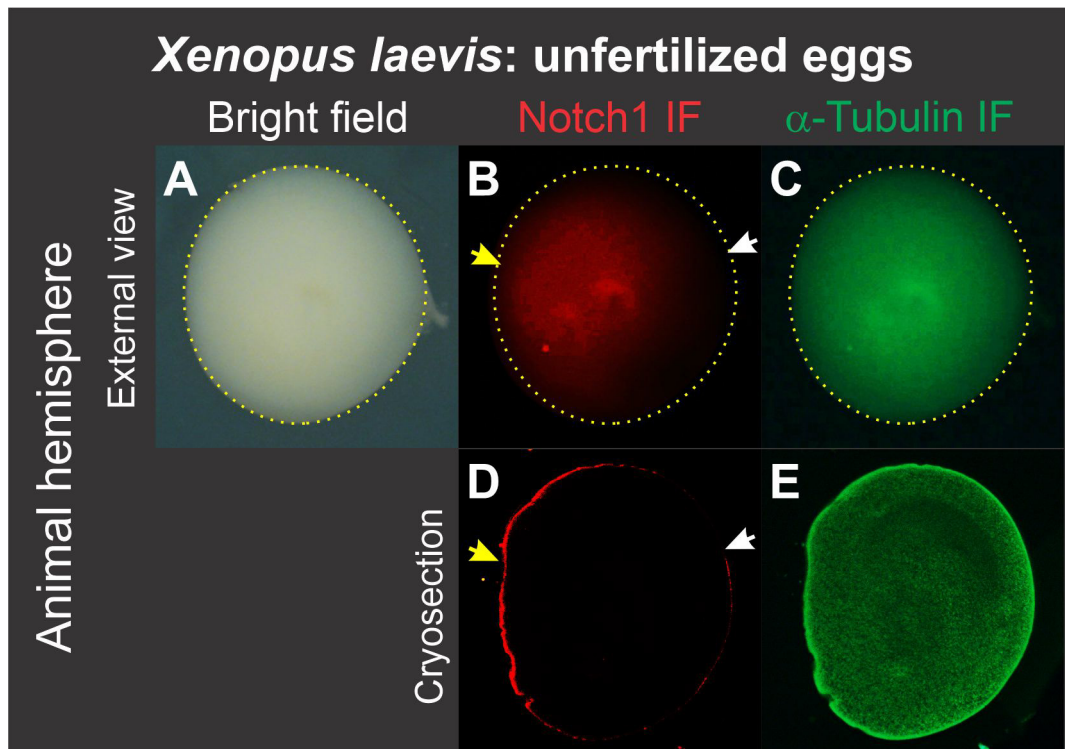

**Figure S5.** Asymmetric distribution of Notch1 protein in the animal hemisphere of unfertilized *X. laevis* eggs. Pigmented animal hemispheres were dissected by cutting them away through the equatorial plane, bleached, and directly processed for whole-mount immunofluorescence (A-C) or cryosections (D,E) followed by immunofluorescence for Notch1 (red fluorescence; B,D) and  $\alpha$ -Tubulin (green fluorescence; C,E) as ubiquitous reference protein. Yellow and white arrows respectively point to the highest and lowest Notch1 immunofluorescence signal, indicating that Notch1 protein is asymmetrically distributed in the animal hemisphere in unfertilized eggs.

## Supplementary Tables

| <i>X. laevis</i> zygotes | Distribution | IF<br>Notch1 protein     | ISH 1<br><i>notch1</i> mRNA | ISH 2<br><i>notch1</i> mRNA | TOTAL<br><i>notch1</i> mRNA |
|--------------------------|--------------|--------------------------|-----------------------------|-----------------------------|-----------------------------|
| Before cortical rotation | Asymmetric   | 19/19<br>(Fig. 2A-D)     | 3/3                         | -                           | 3/3<br>(Fig. 2E-E')         |
|                          | Symmetric    | 0/19                     | 0/3                         | -                           | 0/3                         |
| End of cortical rotation | Asymmetric   | 10/10<br>(not shown) (*) | 11/11                       | 5/5                         | 16/16<br>(Fig. 2F-F') (**)  |
|                          | Symmetric    | 0/10                     | 0/11                        | 0/5                         | 0/16                        |

**Supplementary Table 1.** Notch1 protein and mRNA are asymmetrically distributed in the animal hemisphere of *X. laevis* zygotes before the onset of cortical rotation. Albino embryos at s1 were fixed before or at the end of cortical rotation. They were processed for immunofluorescence (IF) for Notch1 protein combined with ISH for *gdf1* (*vg1*) mRNA or double ISH for *notch1* and *gdf1* (*vg1*) mRNAs. As *gdf1* transcripts are uniformly distributed in the vegetal cortex, this marker was used as a spatial reference for orienting the zygotes in their animal-vegetal axis. Since in double ISH, *gdf1* was revealed with BCIP in the first place, the signal was often lost during the steps for revealing the second probe (*notch1*), and those zygotes were not considered for scoring. Only zygotes with *gdf1* staining were considered for scoring the number of them showing the asymmetric distribution of Notch1 protein or mRNA in the animal hemisphere. We never observed uniform distribution of Notch1 protein or mRNA in zygotes. ISH1 and ISH2 represent batches of eggs from different females. As expected from our previous findings (Castro Colabianchi et al., 2018), Notch1 protein (\*) and *notch1* mRNA (\*\*) were asymmetrically distributed in the animal hemisphere at the end of cortical rotation.

| <i>X. laevis</i><br>unfertilized eggs<br>Immunofluorescence | R1<br>Notch1       | R2<br>Notch1 | R3<br>Notch1/<br>α-tubulin | CRYO1<br>Notch1/<br>GAPDH | CRYO2<br>Notch1/<br>α-tubulin | ALBINO<br>IF Notch1/<br>ISH <i>wnt11b</i> |
|-------------------------------------------------------------|--------------------|--------------|----------------------------|---------------------------|-------------------------------|-------------------------------------------|
|                                                             | Pigmented eggs     |              |                            |                           |                               | Albino eggs                               |
| Notch1<br>Asymmetric distribution                           | 52/54              | 15/16        | 29/29                      | 17/17                     | 4/5                           | 8/9                                       |
| Total                                                       | 96/99, N=3         |              |                            | 21/22, N=2                |                               | 8/9, N=2                                  |
| TOTAL                                                       | 125/130 (96%), N=6 |              |                            |                           |                               |                                           |

**Supplementary Table 2.** Asymmetric distribution of Notch1 protein throughout the animal hemisphere of unfertilized *X. laevis* eggs. R1 to R3, CRYO1, CRYO2, and ALBINO correspond to independent biological replicates (eggs obtained from different females). In R1 to R3, CRYO1, and CRYO2, pigmented animal hemispheres were dissected from eggs by cutting them away through the equatorial plane, bleached and directly processed for immunofluorescence (IF) (R1 to R3) for Notch1 alone or combined with immunofluorescence for  $\alpha$ -tubulin, or processed for cryosections (CRYO1, CRYO2), followed by immunofluorescence for Notch1 combined with immunofluorescence for  $\alpha$ -tubulin or GAPDH as ubiquitous reference proteins. Whole albino eggs were processed for ISH of *wnt11b* mRNA combined with Notch1 immunofluorescence. The orientation of albino eggs in the animal-vegetal axis was verified by the location of *wnt11b* mRNA as a reference, which is uniformly distributed in the vegetal hemisphere in eggs. Only albino eggs with *wnt11b* staining were considered for scoring the number of them showing the asymmetric distribution of Notch1 protein in the animal hemisphere. Values indicate the number of eggs with asymmetric distribution of Notch1 protein throughout the animal hemisphere in relation to the total number of eggs analyzed. N, number of biological replicates.

| X. laevis unfertilized eggs |                                                                                   |            |                                                                                   |            |                                                                                   |            |                                                                                   |            |                                                                                   |            |                                                                                     |                      |                                                                                     |         |                                                                                     |         |
|-----------------------------|-----------------------------------------------------------------------------------|------------|-----------------------------------------------------------------------------------|------------|-----------------------------------------------------------------------------------|------------|-----------------------------------------------------------------------------------|------------|-----------------------------------------------------------------------------------|------------|-------------------------------------------------------------------------------------|----------------------|-------------------------------------------------------------------------------------|---------|-------------------------------------------------------------------------------------|---------|
| ISH                         | notch1                                                                            |            |                                                                                   |            |                                                                                   |            | bmp4                                                                              |            | dll1                                                                              |            | hes4                                                                                |                      | pou5f3.1                                                                            |         |                                                                                     |         |
|                             | Single ISH                                                                        |            | Double ISH<br>(with gdf1)                                                         |            | Double ISH<br>(with pou5f3.1)                                                     |            | Single ISH                                                                        |            | Single ISH                                                                        |            | Single ISH                                                                          |                      | Single ISH                                                                          |         | Double ISH<br>(with notch1)                                                         |         |
|                             | Animal hemisphere<br>(pigmented)                                                  |            | Whole embryo<br>(albino)                                                          |            | Whole embryo<br>(albino)                                                          |            | Animal hemisphere<br>(pigmented)                                                  |            | Animal hemisphere<br>(pigmented)                                                  |            | Animal hemisphere<br>(pigmented)                                                    |                      | Animal hemisphere<br>(pigmented)                                                    |         | Whole embryo<br>(albino)                                                            |         |
|                             |  | Asymmetric |  | Asymmetric |  | Asymmetric |  | Asymmetric |  | Asymmetric |  | Asymmetric<br>(weak) |  | Central |  | Central |
|                             | #80                                                                               | 7/8        | #111                                                                              | 5/5        | A                                                                                 | 10/10      | #81                                                                               | 38/38      | #20                                                                               | 18/19      | #81                                                                                 | 11/12                | #81                                                                                 | 12/13   | A                                                                                   | 10/10   |
|                             | #81                                                                               | 13/14      | #121                                                                              | 11/11      |                                                                                   |            | #89                                                                               | 34/40      |                                                                                   |            |                                                                                     |                      |                                                                                     |         |                                                                                     |         |
|                             | #89                                                                               | 14/14      | #122                                                                              | 8/8        |                                                                                   |            |                                                                                   |            |                                                                                   |            |                                                                                     |                      |                                                                                     |         |                                                                                     |         |
| Total                       | 34/36, N=3                                                                        |            | 24/24, N=3                                                                        |            | 10/10, N=1                                                                        |            |                                                                                   |            |                                                                                   |            |                                                                                     |                      | 12/13, N=1                                                                          |         | 10/10, N=1                                                                          |         |
| TOTAL                       | Asymmetric<br>notch1                                                              |            |                                                                                   |            |                                                                                   |            | Asymmetric<br>bmp4                                                                |            | Asymmetric<br>dll1                                                                |            | Asymmetric<br>hes4 (weak)                                                           |                      | Central<br>pou5f3.1                                                                 |         |                                                                                     |         |
|                             | 68/70                                                                             |            |                                                                                   |            |                                                                                   |            | 72/78                                                                             |            | 18/19                                                                             |            | 11/12                                                                               |                      | 22/23                                                                               |         |                                                                                     |         |
|                             | (97%)                                                                             |            |                                                                                   |            |                                                                                   |            | (92%)                                                                             |            | (95%)                                                                             |            | (92%)                                                                               |                      | (96%)                                                                               |         |                                                                                     |         |
|                             | N=7                                                                               |            |                                                                                   |            |                                                                                   |            | N=2                                                                               |            | N=1                                                                               |            | N=1                                                                                 |                      | N=2                                                                                 |         |                                                                                     |         |

**Supplementary Table 3.** Distribution of *notch1* mRNA and other transcripts throughout the animal hemisphere of unfertilized *X. laevis* eggs. Pigmented eggs were cut through the equatorial plane. animal hemispheres were processed for ISH for the indicated markers. Whole albino eggs were processed for double ISH for *notch1* mRNA and *gdf1* (*vg1*) mRNA or *pou5f3.1* mRNA. For double *notch1/gdf1* ISH, the orientation of albino eggs in the animal-vegetal axis was verified by the location of *gdf1* mRNA as a reference, which is uniformly distributed in the vegetal cortex. Only albino eggs with *gdf1* or *pou5f3.1* staining were considered for scoring the distribution of *notch1* mRNA in the animal hemisphere. Values indicate the number of eggs with the asymmetric or central distribution of the indicated marker throughout the animal hemisphere in relation to the total number of eggs analyzed. N indicates the number of biological replicates (number of independent females employed to obtain eggs).

**Supplementary Table 4.** Results from the morphometric analysis of *notch1* and *pou5f3.1* distribution in unfertilized *X. laevis* eggs. See Table 1 in the main text for definitions and abbreviations of parameters.

See the accompanying Excel file.

| <i>X. laevis</i> oocytes       | sI           | sII          | sIII         | sIV          | sV           | sVI        | Total          |
|--------------------------------|--------------|--------------|--------------|--------------|--------------|------------|----------------|
| Notch1 IF                      | asymmetric   | asymmetric   | asymmetric   | asymmetric   | asymmetric   | asymmetric | asymmetric     |
| IF A                           | 12/12        | 9/9          | 6/6          | 6/6          | 6/6          | 6/6        | 29/29          |
| IF B                           | 7/7          | 3/3          | 7/7          | 6/7          | 4/4          | 1/1        | 28/29          |
| IF A'                          | 11/12        | 10/10        | 6/8          | 6/7          | 9/9          | 8/8        | 50/54          |
| <b>Total asymmetric /stage</b> | <b>30/31</b> | <b>22/22</b> | <b>19/21</b> | <b>19/20</b> | <b>19/19</b> | <b>9/9</b> | <b>118/122</b> |

**Supplementary Table 5.** Notch1 protein is asymmetrically distributed during *X. laevis* oogenesis. Defolliculated oocytes from pigmented females were fixed, bleached, and processed for combined immunofluorescence (IF) for Notch1 protein and ISH for *wnt11b* mRNA as a reference marker of the vegetal pole to orient the oocytes in their animal-vegetal axis. Only oocytes with *wnt11b* staining were considered for scoring the number of them showing the asymmetric distribution of Notch1 protein. IF A and IF A' represent two independent Notch1 immunofluorescence/ *wnt11b* ISH assays of oocytes from female A. IF B represents another Notch1 immunofluorescence/ *wnt11b* ISH assay of oocytes from an independent female. Oocytes were classified according to Dumont (1972) (Dumont, 1972).

| Zebrafish <i>notch1a</i> mRNA distribution (ISH) |           |          |          |          |           |          |           |          |                             |               |
|--------------------------------------------------|-----------|----------|----------|----------|-----------|----------|-----------|----------|-----------------------------|---------------|
| Stage                                            | R1        |          | R2       |          | R3        |          | R4        |          | R1+R2+R3+R4                 |               |
|                                                  | A         | S        | A        | S        | A         | S        | A         | S        | A                           | S             |
| 1c                                               |           |          |          |          | 6         | 0        | 22        | 0        | 28                          | 0             |
| 2c                                               |           |          |          |          | 2         | 0        | 24        | 0        | 26                          | 0             |
| 4c                                               | 3         | 0        | 2        | 0        | 5         | 0        | 21        | 0        | 31                          | 0             |
| 8c                                               | 5         | 0        |          |          | 1         | 0        | 15        | 0        | 21                          | 0             |
| 16c                                              | 6         | 0        |          |          |           |          | 4         | 0        | 10                          | 0             |
| 32c                                              | 3         | 0        |          |          |           |          | 12        | 0        | 15                          | 0             |
| 64c                                              |           |          | 1        | 0        |           |          |           |          | 1                           | 0             |
| Sphere                                           |           |          | 2        | 0        |           |          |           |          | 2                           | 0             |
| <b>Total</b>                                     | <b>17</b> | <b>0</b> | <b>5</b> | <b>0</b> | <b>14</b> | <b>0</b> | <b>98</b> | <b>0</b> | <b>134</b><br><b>(100%)</b> | <b>0 (0%)</b> |

**Supplementary Table 6.** Zebrafish *notch1a* mRNA is asymmetrically distributed along the animal hemisphere during early embryogenesis. The spatial expression of *notch1a* transcripts was analyzed by ISH from the 1-cell stage (zygote) until the sphere stage. R1 to R4 are biological replicates from four independent mating pairs. A, asymmetric distribution; S, symmetric distribution.

## References

- Castro Colabianchi, A. M., Revinski, D. R., Encinas, P. I., Baez, M. V., Monti, R. J., Rodríguez Abinal, M., et al. (2018). Notch1 is asymmetrically distributed from the beginning of embryogenesis and controls the ventral center. *Development* 145, dev159368. doi: 10.1242/dev.159368.
- Dumont, J. N. (1972). Oogenesis in *Xenopus laevis* (Daudin). I. Stages of oocyte development in laboratory maintained animals. *J. Morphol.* 136, 153–179. doi: 10.1002/jmor.1051360203.
